# Supplementary material for: Life cycle assessment, quo vadis? Supporting or deterring greenwashing? A survey of practitioners
Source: Royal Society of Chemistry journal article supplement (doi:10.1039/d3va00317e), 2023-12-20
Supplement: d3va00317e1.pdf [file d3va00317e1.pdf]

- as a decision maker in a company
- as a public policy maker
- other

## Supporting Information

### A) Survey questions

#### Characterisation of the respondent

In what role do you work with LCA?

- as an academic
- as a consultant

How long have you been teaching and/or practicing LCA?

- 0 - 2 years
- 2 - 5 years
- 5 - 10 years
- more than 10 years

Table S1 presents the 22 survey statements.

Table S1: Survey statements. Each statement was accompanied by the following prompt: "Please indicate the degree to which you agree with the following statements."

| Classification                                                                                                                                                                                                                                | Survey Statement                                                                                                                                                                                                                                                                                                                         |
|-----------------------------------------------------------------------------------------------------------------------------------------------------------------------------------------------------------------------------------------------|------------------------------------------------------------------------------------------------------------------------------------------------------------------------------------------------------------------------------------------------------------------------------------------------------------------------------------------|
| <b>State of LCA: Robustness of Results</b>                                                                                                                                                                                                    | S1 - I acknowledge results may be biased but do not see this as a threat.                                                                                                                                                                                                                                                                |
|                                                                                                                                                                                                                                               | S2 - The main factor behind different results is real differences in the systems modelled.                                                                                                                                                                                                                                               |
|                                                                                                                                                                                                                                               | S3 - LCA results representing a similar system vary as a consequence of different data usage, but also due to inconsistency in methodological choices between different practitioners.                                                                                                                                                   |
|                                                                                                                                                                                                                                               | S4 - In my applications of LCA, published results tend to be discrepant.                                                                                                                                                                                                                                                                 |
|                                                                                                                                                                                                                                               | S5 - Disparate or contrasting results is an issue, e.g. because results can be used for greenwashing.                                                                                                                                                                                                                                    |
| <b>State of LCA: Standardisation</b>                                                                                                                                                                                                          | S6 - I think there is one right way of applying LCA.                                                                                                                                                                                                                                                                                     |
|                                                                                                                                                                                                                                               | S7 - The LCA community can agree on a common LCA approach.                                                                                                                                                                                                                                                                               |
|                                                                                                                                                                                                                                               | S8 - The ISO 14040-44 standards are good enough for guiding LCA practice.                                                                                                                                                                                                                                                                |
|                                                                                                                                                                                                                                               | S9 - We need greater standardization (i.e. lower variability in the application of LCA) to ensure consistency of results.                                                                                                                                                                                                                |
|                                                                                                                                                                                                                                               | S10 - The proliferation of LCA guidelines has not helped cementing the robustness of LCA as a tool.                                                                                                                                                                                                                                      |
| <b>State of LCA: My practice</b>                                                                                                                                                                                                              | S11 - The LCA studies I conduct are ISO compliant.                                                                                                                                                                                                                                                                                       |
|                                                                                                                                                                                                                                               | S12 - My LCA practice reflects a consequential approach.                                                                                                                                                                                                                                                                                 |
|                                                                                                                                                                                                                                               | S13 - My LCA practice reflects an attributional approach.                                                                                                                                                                                                                                                                                |
|                                                                                                                                                                                                                                               | S14 - I avoid allocation in my system model                                                                                                                                                                                                                                                                                              |
|                                                                                                                                                                                                                                               | S15 - I handle co-production via allocation                                                                                                                                                                                                                                                                                              |
| <b>Values reflected in my LCA practice</b>                                                                                                                                                                                                    | S16 - I value consistency over flexibility.                                                                                                                                                                                                                                                                                              |
|                                                                                                                                                                                                                                               | S17 - I value accurate results over precise results.                                                                                                                                                                                                                                                                                     |
|                                                                                                                                                                                                                                               | S18 - I value minimizing uncertainty of results over precision of results.                                                                                                                                                                                                                                                               |
|                                                                                                                                                                                                                                               | S19 - I value representativeness of results.                                                                                                                                                                                                                                                                                             |
|                                                                                                                                                                                                                                               | S20 - I value reproducibility of results.                                                                                                                                                                                                                                                                                                |
|                                                                                                                                                                                                                                               | S21 - I value LCA as a tool for making decisions.                                                                                                                                                                                                                                                                                        |
|                                                                                                                                                                                                                                               | S22 - I value LCA as a tool for learning.                                                                                                                                                                                                                                                                                                |
| <b>Do methodological choices determine LCA results?</b><br>One of the main methodological choices to which results are sensitive is (multiple options can be chosen):<br><b>Check all that apply.</b>                                         | <ul style="list-style-type: none"> <li>- LCI database used.</li> <li>- the system model adopted.</li> <li>- methodological choices regarding data (marginal vs average).</li> <li>- the degree of completeness of the background system (input-output vs process).</li> <li>- all of the above in (more or less) equal weight</li> </ul> |
| <ul style="list-style-type: none"> <li>- the way in which co-production is handled.</li> <li>- the degree to which market-mediated effects are included.</li> <li>- methodological choices regarding LCIA characterisation models.</li> </ul> |                                                                                                                                                                                                                                                                                                                                          |

### B) Heatmap of survey responses

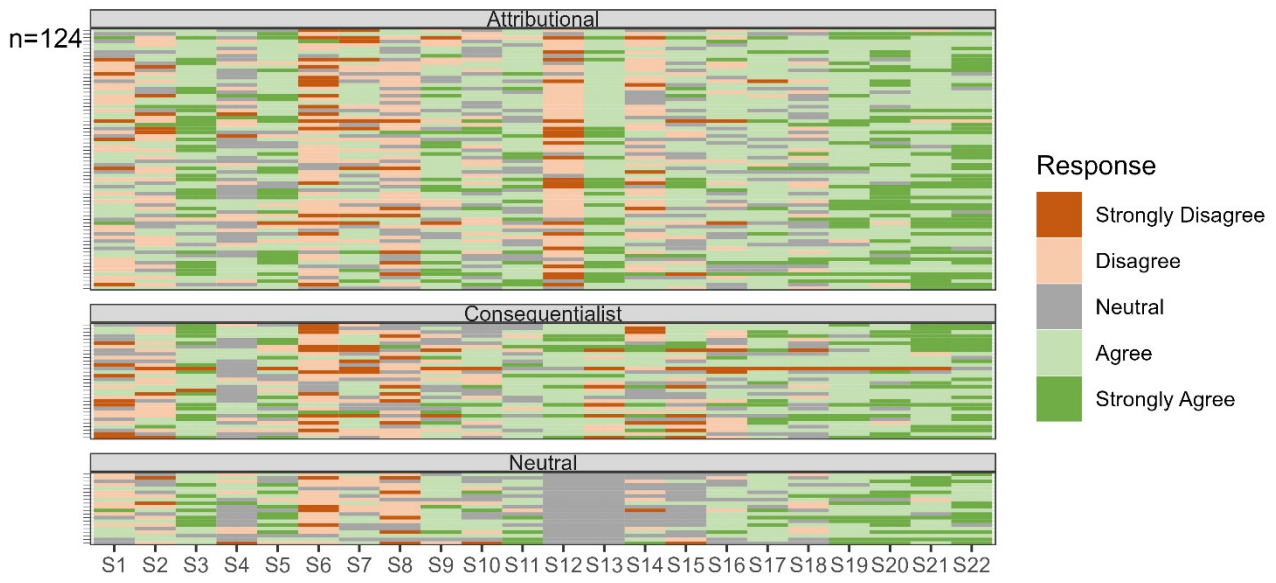

Figure S1: Heatmap showing every response (S1 to S22, columns) from every participant (n=124, rows). S12 and S13 are statements referring to attributional or consequential approaches in their LCA practice, which we used to divide participants in 3 panels.

### C) Statistical Analysis Results

#### C1) KNN Results

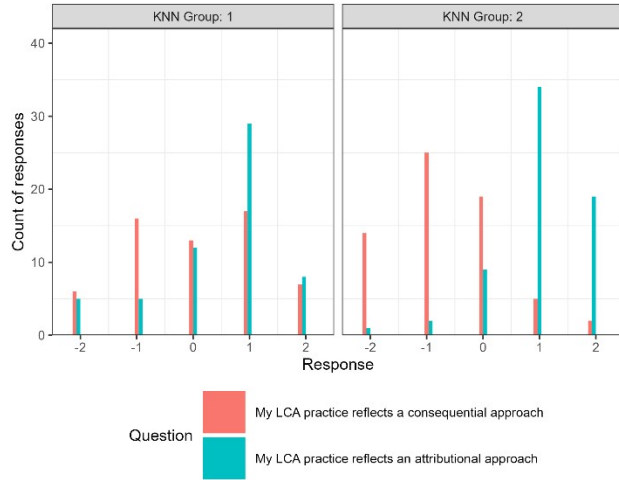

Figure S2: KNN Algorithm clusters using k=2. Size of groups are 57 and 67, respectively. KNN with k=3 and k=5 showed clusters similar to cluster 2, where pure attributional practitioners can be identified.

#### C2) Spearman Correlation Matrix

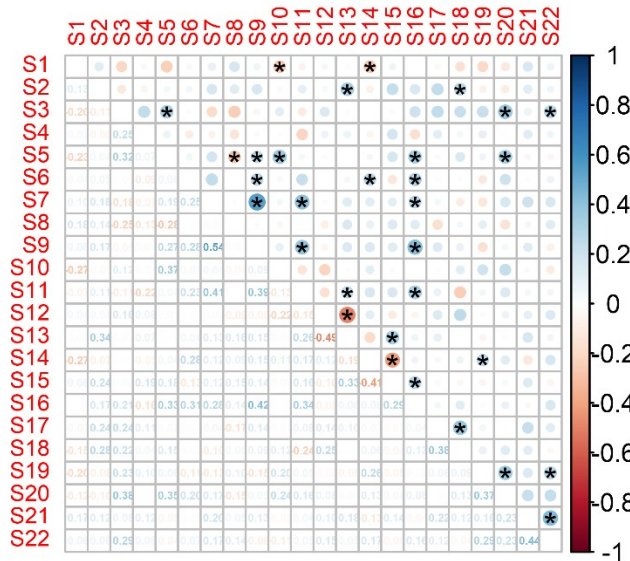

Figure S3: Spearman Correlation matrix between all 22 statements ( $p < 0.05$ ). Conversion Scale: Strongly Disagree = -2; Disagree = -1; Neutral = 0; Agree = 1; Strongly Agree = 2. Figure was created using the R library "corrplot" [25].

#### C3) Other models: Attributional as dependent variable

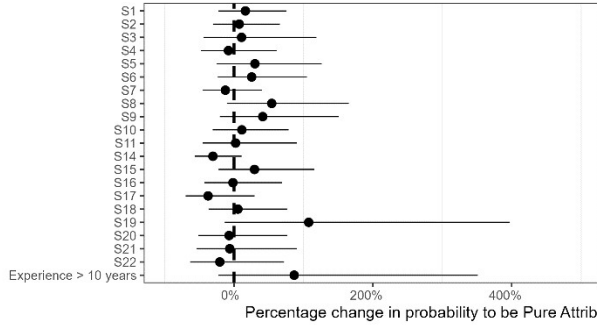

Figure S4: Full Logistic regression model to predict adherence towards attributional LCA preferences. n=124. Prediction accuracy: 67%.

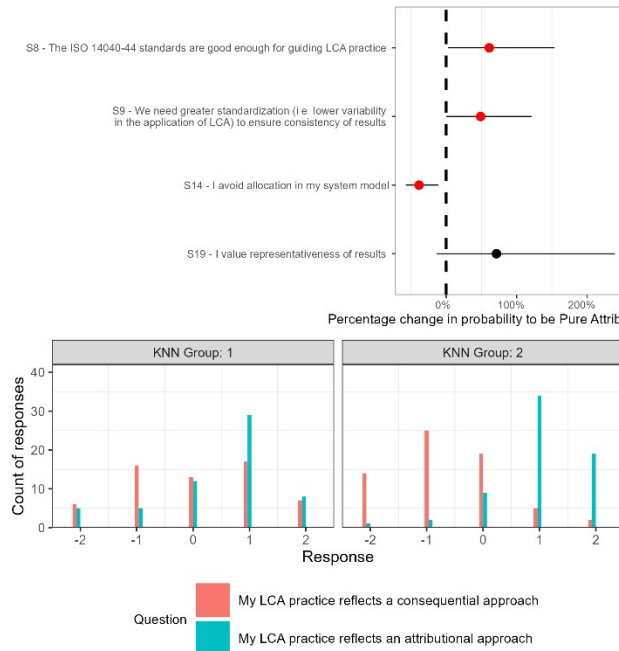

Figure S5: Backwards stepwise logistic regression model to predict adherence towards attributional LCA preferences. A red dot indicates a statistically significant effect found at 95% level. n=124. Prediction accuracy: 67%.

#### C4) Other models: Greenwashing concern as dependent variable

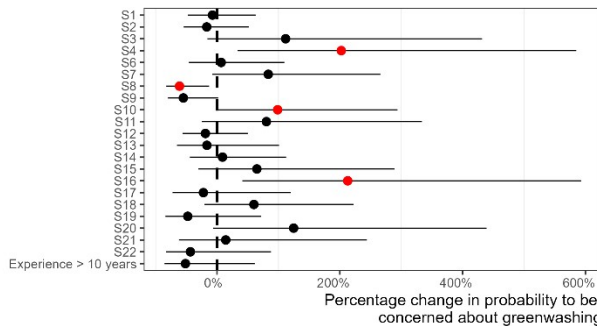

Figure S6: Full logistic regression model to predict concern greenwashing due to disparate results in LCA. A red dot indicates a statistically significant effect found at 95% level. n=124. Prediction accuracy: 80%.
